# Supplementary material for: How critical is geometrical confinement? Analysis of spatially and temporally resolved particulate matter removal with an electrostatic precipitator
Source: Royal Society of Chemistry journal article supplement (doi:10.1039/c8ra04734k), 2018-01-01
Supplement: c8ra04734k1.pdf [file c8ra04734k1.pdf]

## Supporting Information

# How Critical is Geometrical Confinement? Analysis of Spatially and Temporally Resolved Particulate Matter Removal with Electrostatic Precipitator

*Ching-Yu Wang and Cheng-Che Hsu\**

Department of Chemical Engineering, National Taiwan University, No. 1, Sec. 4,  
Roosevelt Road, Taipei, Taiwan

E-mail: [chsu@ntu.edu.tw](mailto:chsu@ntu.edu.tw)

Number of pages: 3

Number of figures: 2

Number of tables: 0

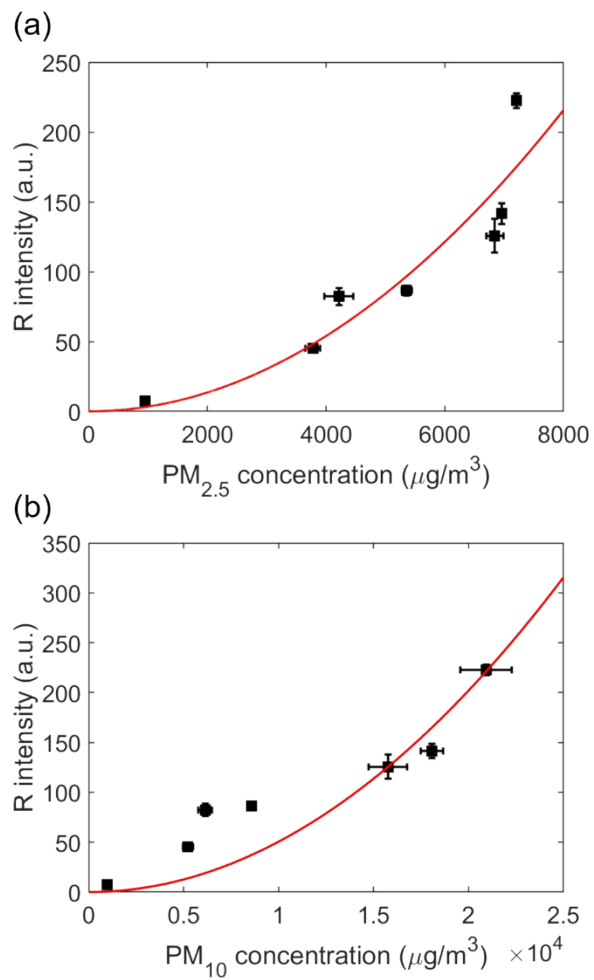

Figure S1. Calibration line of absolute (a)  $PM_{2.5}$  and (b)  $PM_{10}$  concentration for R component.

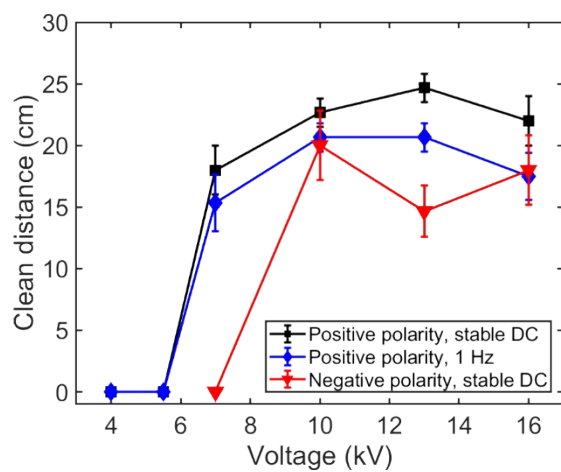

Figure S2. Clean distance with different electrical modes and voltage of 4-16 kV at 15<sup>th</sup> second in tubular system with diameter of 3 cm; the clean distance is defined as the region with relative intensity lower than 0.2.
